# Supplementary material
Source: publisher figshare collection journal article supplement (https://acs.figshare.com/ndownloader/files/3820378)
Supplement: Supplementary file 1 [file 3820378]

data_1
_audit_creation_method            SHELXL-97
_chemical_name_common             ?
_chemical_name_systematic
;
 ? 
;
_chemical_formula_moiety          ?
_chemical_formula_sum             'C13 H12 O2 S'
_chemical_formula_weight          232.29
_chemical_absolute_configuration  'ad'
_chemical_melting_point           ?
loop_
  _atom_type_symbol
  _atom_type_description
  _atom_type_scat_dispersion_real
  _atom_type_scat_dispersion_imag
  _atom_type_scat_source
 'C' 'C' 0.0181 0.0091 'International Tables Vol C Tables 4.2.6.8 and 6.1.1.4'
 'H' 'H' 0.0000 0.0000 'International Tables Vol C Tables 4.2.6.8 and 6.1.1.4'
 'O' 'O' 0.0492 0.0322 'International Tables Vol C Tables 4.2.6.8 and 6.1.1.4'
 'S' 'S' 0.3331 0.5567 'International Tables Vol C Tables 4.2.6.8 and 6.1.1.4'

loop_
  _space_group_symop_id
  _space_group_symop_operation_xyz
 1 'x, y, z'
 2 '-x+1/2, -y, z+1/2'
 3 'x+1/2, -y+1/2, -z'
 4 '-x, y+1/2, -z+1/2'

_symmetry_cell_setting            Orthorhombic
_symmetry_space_group_name_H-M    'P 21 21 21'
_cell_length_a                    6.7450(2)
_cell_length_b                    7.3199(2)
_cell_length_c                    23.9210(9)
_cell_angle_alpha                 90.00
_cell_angle_beta                  90.00
_cell_angle_gamma                 90.00
_cell_volume                      1181.04(7)
_cell_formula_units_Z             4
_cell_measurement_reflns_used     ?
_cell_measurement_temperature     298(2)
_cell_measurement_theta_max       ?
_cell_measurement_theta_min       ?
_exptl_absorpt_coefficient_mu     2.288
_exptl_absorpt_correction_T_max   0.9345
_exptl_absorpt_correction_T_min   0.8942
_exptl_absorpt_correction_type    multi-scan
_exptl_absorpt_process_details    'SADABS'
_exptl_crystal_colour             colorless
_exptl_crystal_density_diffrn     1.306
_exptl_crystal_density_meas       ?
_exptl_crystal_density_method     'not measured'
_exptl_crystal_description        plate
_exptl_crystal_F_000              488
_exptl_crystal_size_max           0.05
_exptl_crystal_size_mid           0.05
_exptl_crystal_size_min           0.03
_exptl_special_details
;
 ? 
;
_diffrn_reflns_av_R_equivalents   0.0324
_diffrn_reflns_av_sigmaI/netI     0.0331
_diffrn_reflns_limit_h_max        6
_diffrn_reflns_limit_h_min        -7
_diffrn_reflns_limit_k_max        2
_diffrn_reflns_limit_k_min        -8
_diffrn_reflns_limit_l_max        25
_diffrn_reflns_limit_l_min        -26
_diffrn_reflns_number             4442
_diffrn_reflns_theta_full         61.13
_diffrn_reflns_theta_max          61.13
_diffrn_reflns_theta_min          3.70
_diffrn_ambient_temperature       298(2)
_diffrn_detector_area_resol_mean  ?
_diffrn_measured_fraction_theta_full 0.992
_diffrn_measured_fraction_theta_max 0.992
_diffrn_measurement_device_type   'Germini S Ultra'
_diffrn_measurement_method        'phi and omega scans'
_diffrn_radiation_monochromator   graphite
_diffrn_radiation_source          'fine-focus sealed tube'
_diffrn_radiation_type            CuK\a
_diffrn_radiation_wavelength      1.54178
_diffrn_standards_decay_%         negligible
_diffrn_standards_interval_count  ?
_diffrn_standards_interval_time   ?
_diffrn_standards_number          ?
_reflns_number_gt                 1675
_reflns_number_total              1806
_reflns_threshold_expression      >2sigma(I)
_computing_cell_refinement        ?
_computing_data_collection        ?
_computing_data_reduction         ?
_computing_molecular_graphics     ?
_computing_publication_material   ?
_computing_structure_refinement   'SHELXL-97 (Sheldrick, 1997)'
_computing_structure_solution     'SHELXS-97 (Sheldrick, 1990)'
_refine_diff_density_max          0.115
_refine_diff_density_min          -0.205
_refine_diff_density_rms          0.035
_refine_ls_abs_structure_details  'Flack H D (1983), Acta Cryst. A39, 876-881'
_refine_ls_abs_structure_Flack    0.00(2)
_refine_ls_extinction_coef        ?
_refine_ls_extinction_method      none
_refine_ls_goodness_of_fit_ref    1.087
_refine_ls_hydrogen_treatment     mixed
_refine_ls_matrix_type            full
_refine_ls_number_parameters      146
_refine_ls_number_reflns          1806
_refine_ls_number_restraints      0
_refine_ls_R_factor_all           0.0363
_refine_ls_R_factor_gt            0.0323
_refine_ls_restrained_S_all       1.087
_refine_ls_shift/su_max           0.000
_refine_ls_shift/su_mean          0.000
_refine_ls_structure_factor_coef  Fsqd
_refine_ls_weighting_details
'calc w=1/[\s^2^(Fo^2^)+(0.0350P)^2^+0.0400P] where P=(Fo^2^+2Fc^2^)/3'
_refine_ls_weighting_scheme       calc
_refine_ls_wR_factor_gt           0.0733
_refine_ls_wR_factor_ref          0.0760
_refine_special_details
;
 Refinement of F^2^ against ALL reflections.  The weighted R-factor wR and 
 goodness of fit S are based on F^2^, conventional R-factors R are based 
 on F, with F set to zero for negative F^2^. The threshold expression of 
 F^2^ > 2sigma(F^2^) is used only for calculating R-factors(gt) etc. and is 
 not relevant to the choice of reflections for refinement.  R-factors based 
 on F^2^ are statistically about twice as large as those based on F, and R- 
 factors based on ALL data will be even larger. 
;
_atom_sites_solution_hydrogens    geom
_atom_sites_solution_primary      direct
_atom_sites_solution_secondary    difmap
loop_
  _atom_site_label
  _atom_site_type_symbol
  _atom_site_fract_x
  _atom_site_fract_y
  _atom_site_fract_z
  _atom_site_U_iso_or_equiv
  _atom_site_adp_type
  _atom_site_occupancy
  _atom_site_symmetry_multiplicity
  _atom_site_calc_flag
  _atom_site_refinement_flags
  _atom_site_disorder_assembly
  _atom_site_disorder_group
 S1 S -0.62747(8) -0.39799(7) -0.11304(2) 0.04591(17) Uani 1 1 d . . .
 O2 O -0.4169(2) -0.3889(2) -0.13356(8) 0.0640(5) Uani 1 1 d . . .
 C1 C -0.9647(3) -0.2268(3) -0.14904(9) 0.0448(5) Uani 1 1 d . . .
 C6 C -0.7634(3) -0.2510(3) -0.15877(9) 0.0431(5) Uani 1 1 d . . .
 C8 C -0.6489(4) -0.7656(3) -0.09904(10) 0.0546(6) Uani 1 1 d . . .
 C2 C -1.0686(4) -0.1039(3) -0.18226(10) 0.0537(6) Uani 1 1 d . . .
 H5 H -1.2026 -0.0833 -0.1757 0.064 Uiso 1 1 calc R . .
 O1 O -1.0472(2) -0.3219(3) -0.10668(8) 0.0615(5) Uani 1 1 d . . .
 H6 H -1.1667 -0.3322 -0.1121 0.092 Uiso 1 1 calc R . .
 C3 C -0.9732(4) -0.0123(4) -0.22495(12) 0.0587(7) Uani 1 1 d . . .
 H7 H -1.0437 0.0693 -0.2472 0.070 Uiso 1 1 calc R . .
 C4 C -0.7751(4) -0.0408(4) -0.23479(12) 0.0631(7) Uani 1 1 d . . .
 H8 H -0.7121 0.0204 -0.2639 0.076 Uiso 1 1 calc R . .
 C5 C -0.6694(4) -0.1602(3) -0.20151(10) 0.0538(6) Uani 1 1 d . . .
 H9 H -0.5350 -0.1792 -0.2080 0.065 Uiso 1 1 calc R . .
 C7 C -0.7177(4) -0.6178(3) -0.13783(11) 0.0588(6) Uani 1 1 d . . .
 H10A H -0.8614 -0.6167 -0.1393 0.071 Uiso 1 1 calc R . .
 H10B H -0.6679 -0.6409 -0.1752 0.071 Uiso 1 1 calc R . .
 C10 C -0.7070(7) -0.9711(4) -0.02228(15) 0.0920(12) Uani 1 1 d . . .
 H11 H -0.7929 -1.0200 0.0042 0.110 Uiso 1 1 calc R . .
 C13 C -0.4548(4) -0.8284(4) -0.10090(12) 0.0658(7) Uani 1 1 d . . .
 H12 H -0.3676 -0.7823 -0.1275 0.079 Uiso 1 1 calc R . .
 C11 C -0.5146(8) -1.0289(4) -0.02489(14) 0.0884(11) Uani 1 1 d . . .
 H13 H -0.4694 -1.1169 0.0001 0.106 Uiso 1 1 calc R . .
 C9 C -0.7738(5) -0.8379(4) -0.05969(14) 0.0761(9) Uani 1 1 d . . .
 H14 H -0.9045 -0.7980 -0.0578 0.091 Uiso 1 1 calc R . .
 C12 C -0.3905(6) -0.9599(4) -0.06320(15) 0.0813(9) Uani 1 1 d . . .
 H16 H -0.2599 -1.0004 -0.0645 0.098 Uiso 1 1 calc R . .

loop_
  _atom_site_aniso_label
  _atom_site_aniso_U_11
  _atom_site_aniso_U_22
  _atom_site_aniso_U_33
  _atom_site_aniso_U_23
  _atom_site_aniso_U_13
  _atom_site_aniso_U_12
 S1 0.0381(3) 0.0439(3) 0.0557(3) -0.0002(3) -0.0040(3) -0.0003(3)
 O2 0.0329(8) 0.0687(10) 0.0902(12) 0.0044(10) -0.0006(8) 0.0003(8)
 C1 0.0408(12) 0.0464(12) 0.0471(12) 0.0020(11) 0.0000(10) 0.0003(10)
 C6 0.0402(12) 0.0419(11) 0.0473(12) 0.0004(10) -0.0027(10) -0.0030(10)
 C8 0.0645(16) 0.0385(11) 0.0609(15) -0.0062(11) -0.0035(13) -0.0025(12)
 C2 0.0475(13) 0.0523(12) 0.0614(14) 0.0036(13) -0.0050(11) 0.0062(12)
 O1 0.0392(8) 0.0829(11) 0.0625(10) 0.0232(10) 0.0025(8) 0.0005(8)
 C3 0.0635(17) 0.0518(13) 0.0606(16) 0.0098(12) -0.0111(13) 0.0009(13)
 C4 0.0686(18) 0.0597(17) 0.0611(16) 0.0151(13) 0.0007(14) -0.0137(14)
 C5 0.0456(14) 0.0561(14) 0.0598(14) 0.0023(12) 0.0059(11) -0.0081(11)
 C7 0.0592(14) 0.0461(13) 0.0711(15) -0.0008(13) -0.0126(12) -0.0014(12)
 C10 0.143(4) 0.0629(19) 0.070(2) 0.0023(17) 0.028(2) -0.009(2)
 C13 0.0716(17) 0.0563(14) 0.0695(18) 0.0021(14) 0.0019(14) 0.0094(14)
 C11 0.150(4) 0.0556(16) 0.059(2) -0.0029(15) -0.011(2) 0.013(2)
 C9 0.086(2) 0.0522(16) 0.090(2) -0.0034(16) 0.0173(18) -0.0028(15)
 C12 0.096(2) 0.0635(17) 0.084(2) -0.0083(16) -0.018(2) 0.0241(18)

_geom_special_details
;
 All esds (except the esd in the dihedral angle between two l.s. planes) 
 are estimated using the full covariance matrix.  The cell esds are taken 
 into account individually in the estimation of esds in distances, angles 
 and torsion angles; correlations between esds in cell parameters are only 
 used when they are defined by crystal symmetry.  An approximate (isotropic) 
 treatment of cell esds is used for estimating esds involving l.s. planes. 
;
loop_
  _geom_bond_atom_site_label_1
  _geom_bond_atom_site_label_2
  _geom_bond_distance
  _geom_bond_site_symmetry_2
  _geom_bond_publ_flag
 S1 O2 1.5045(16) . ?
 S1 C6 1.787(2) . ?
 S1 C7 1.820(2) . ?
 C1 C6 1.389(3) . ?
 C1 C2 1.390(3) . ?
 C1 O1 1.349(3) . ?
 C6 C5 1.374(3) . ?
 C8 C7 1.498(4) . ?
 C8 C13 1.388(4) . ?
 C8 C9 1.370(4) . ?
 C2 C3 1.381(4) . ?
 C3 C4 1.373(4) . ?
 C4 C5 1.381(4) . ?
 C10 C11 1.367(6) . ?
 C10 C9 1.398(5) . ?
 C13 C12 1.388(4) . ?
 C11 C12 1.340(5) . ?

loop_
  _geom_angle_atom_site_label_1
  _geom_angle_atom_site_label_2
  _geom_angle_atom_site_label_3
  _geom_angle
  _geom_angle_site_symmetry_1
  _geom_angle_site_symmetry_3
  _geom_angle_publ_flag
 O2 S1 C6 104.96(10) . . ?
 O2 S1 C7 104.38(12) . . ?
 C6 S1 C7 99.28(11) . . ?
 C6 C1 C2 118.7(2) . . ?
 O1 C1 C6 117.6(2) . . ?
 O1 C1 C2 123.7(2) . . ?
 C1 C6 S1 118.41(17) . . ?
 C5 C6 S1 120.65(18) . . ?
 C5 C6 C1 120.9(2) . . ?
 C13 C8 C7 120.7(2) . . ?
 C9 C8 C7 120.9(3) . . ?
 C9 C8 C13 118.3(3) . . ?
 C3 C2 C1 120.2(2) . . ?
 C4 C3 C2 120.4(3) . . ?
 C3 C4 C5 120.0(3) . . ?
 C6 C5 C4 119.8(2) . . ?
 C8 C7 S1 109.44(17) . . ?
 C11 C10 C9 119.5(3) . . ?
 C12 C13 C8 120.2(3) . . ?
 C12 C11 C10 120.5(3) . . ?
 C8 C9 C10 120.7(3) . . ?
 C11 C12 C13 120.7(4) . . ?
